# Supplementary material for: Two Decades of Coastal Dolphin Population Surveys in Israel, Eastern Mediterranean
Source: MDPI journal article supplement (doi:10.3390/biology12020328), 2023-02-17
Supplement: s1 [file s1]

Table S1. Model comparison of three main models; 1) All Data, 2) 1999-2009, and 3) 2010-2019, for datasets with and without ‘chlorophyll *a*’ data.

| Model name    | N dolphin observations | N Zero | % non zero | N variables | % Deviance Explained | AIC  | Variable names                                                   |
|---------------|------------------------|--------|------------|-------------|----------------------|------|------------------------------------------------------------------|
| All Years CHL | 252                    | 2062   | 12.22      | 6           | 21                   | 2786 | DESAL + SEARCHING + SHORE + SST + BOTTOM + SLOPE                 |
| 1999-2009 CHL | 99                     | 1681   | 5.89       | 8           | 25                   | 1223 | SEARCHING + SHORE + DEPTH + DESAL + WRECK + SLOPE + SST + CHL    |
| 2010-2019 CHL | 153                    | 1737   | 8.81       | 5           | 26                   | 1775 | DESAL + SST + SHORE + SEARCHING + DEPTH                          |
| All Years     | 284                    | 2362   | 12.02      | 7           | 23                   | 3134 | DESAL + SEARCHING + SHORE + DEPTH + SST + BOTTOM + SLOPE         |
| 1999-2009     | 113                    | 1850   | 6.11       | 8           | 23                   | 1391 | SEARCHING + SHORE + DESAL + DEPTH + WRECK + SLOPE + BOTTOM + SST |
| 2010-2019     | 171                    | 2028   | 8.43       | 6           | 31                   | 1988 | DESAL + SST + SHORE + SEARCHING + DEPTH + NUTRIENTS              |

Table S2. Models for *Tursiops truncatus* distribution, including the variable ‘chlorophyll *a*’ as run on the full dataset for all years, years 1999-2009, and years 2010-2019. First three rows display results utilizing Negative Binomial distribution, while following three rows utilize Tweedie distribution. Variables that are statistically significant have names marked in blue. All vertical axes indicate the probability of dolphin occurrence on a scale of 0 to 1 (except instances where scale is minimized for clarity), while horizontal axes are presented in the units of the relevant explanatory variable, and above the horizontal axis are markings, indicating number of non-zero observations at that value of explanatory variable. Gray shaded areas represent 95% Confidence Interval.

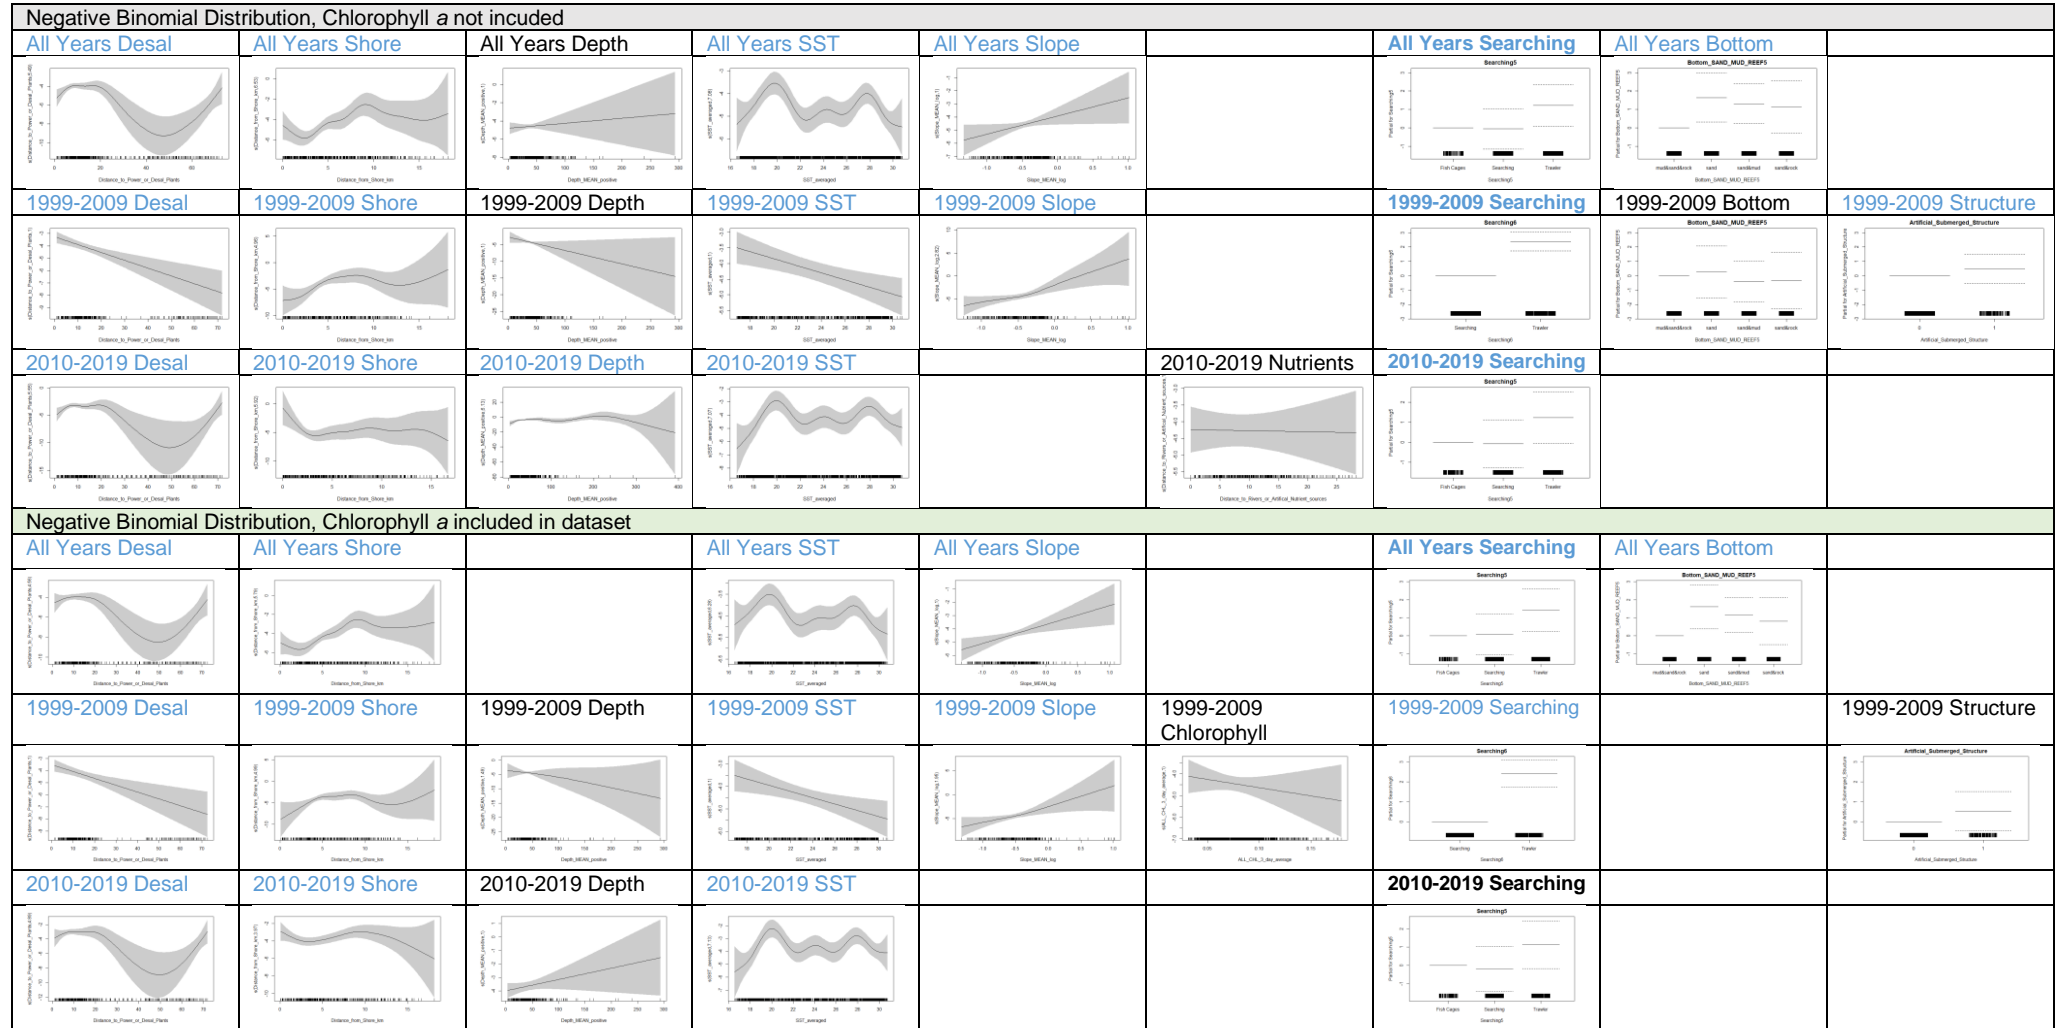

Table S3. Summary of final models for each sub-set. Information includes number of sightings within the subset, deviance explained for Negative Binomial based models and Tweedie based models, and names of explanatory variables for Negative Binomial based models and Tweedie based models.

| Model name       | N Dolphin Observations | N Zeros | % Non-Zero | % Deviance Explained (NB) | Variable names (NB)                                              | % Deviance Explained (TW) | Variable names (TW)                                         |
|------------------|------------------------|---------|------------|---------------------------|------------------------------------------------------------------|---------------------------|-------------------------------------------------------------|
| All Years        | 284                    | 2362    | 12         | 23                        | DESAL + SEARCHING + SHORE + DEPTH + SST + BOTTOM + SLOPE         | 21                        | DESAL + SEARCHING + SLOPE + DEPTH + SST + NUTRIENTS + WRECK |
| 1999-2009        | 113                    | 1850    | 6.1        | 23                        | SEARCHING + SHORE + DESAL + DEPTH + WRECK + SLOPE + BOTTOM + SST | 18                        | SEARCHING + SST + SHORE + DESAL + SLOPE + DEPTH             |
| 2010-2019        | 171                    | 2028    | 8.4        | 31                        | DESAL + SST + SHORE + SEARCHING + DEPTH + NUTRIENTS              | 26                        | DESAL + SHORE + SEARCHING + SST                             |
| All Years HOT    | 154                    | 2521    | 6.1        | 26                        | SEARCHING + DESAL + SST + SHORE + BOTTOM                         | 27                        | SEARCHING + DESAL + BOTTOM                                  |
| All Years COLD   | 130                    | 2204    | 5.9        | 27                        | DESAL + SHORE + SST + SEARCHING + SLOPE + NUTRIENTS + WRECK      | 23                        | DESAL + DEPTH + SEARCHING + SST                             |
| 1999-2009 HOT    | 61                     | 2010    | 3          | 39                        | SEARCHING + SHORE + SST + WRECK + NUTRIENTS                      | 16                        | SEARCHING                                                   |
| 1999-2009 COLD   | 52                     | 1691    | 3.1        | 18                        | DESAL + SHORE + WRECK + SEARCHING + SLOPE + NUTRIENTS + BOTTOM   | 05                        | SEARCHING + WRECK                                           |
| 2010-2019 HOT    | 93                     | 2146    | 4.3        | 29                        | DESAL + SEARCHING + SHORE + SST + BOTTOM + DEPTH                 | 22                        | DESAL + SEARCHING                                           |
| 2010-2019 COLD   | 78                     | 1909    | 4.1        | 36                        | DESAL + SST + SEARCHING + NUTRIENTS + WRECK                      | 34                        | DESAL + SHORE + DEPTH + SEARCHING                           |
| All Years Area 1 | 13                     | 739     | 1.8        | 46                        | DESAL                                                            | 44                        | DESAL + SEARCHING                                           |
| All Years Area 2 | 1                      | NA      | NA         | NA                        | NA                                                               | NA                        | NA                                                          |
| All Years Area 3 | 43                     | 1449    | 3          | 40                        | SEARCHING + DESAL + BOTTOM + DEPTH                               | 33                        | DESAL + SEARCHING                                           |
| All Years Area 4 | 172                    | 3207    | 5.4        | 15                        | SST + SEARCHING + SHORE                                          | 10                        | SEARCHING + SST                                             |
| All Years Area 5 | 55                     | 2009    | 2.7        | 07                        | SEARCHING                                                        | 5                         | SEARCHING                                                   |
| 1999-2009 Area 1 | 5                      | 232     | 2.2        | 38                        | SST                                                              | 28                        | SLOPE + DEPTH                                               |
| 1999-2009 Area 2 | 1                      | NA      | NA         | NA                        | NA                                                               | NA                        | NA                                                          |
| 1999-2009 Area 3 | 35                     | 663     | 5.3        | 23                        | SEARCHING + BOTTOM + WRECK                                       | 21                        | SEARCHING + DEPTH                                           |
| 1999-2009 Area 4 | 65                     | 1362    | 4.8        | 18                        | SEARCHING + SST                                                  | 11                        | SEARCHING                                                   |
| 1999-2009 Area 5 | 7                      | 168     | 4.2        | 31                        | SST                                                              | 33                        | SST                                                         |
| 2010-2019 Area 1 | 8                      | 507     | 1.6        | 74                        | DEPTH + DESAL + SEARCHING                                        | 50                        | DESAL + SEARCHING                                           |
| 2010-2019 Area 2 | 0                      | NA      | NA         | NA                        | NA                                                               | NA                        | NA                                                          |
| 2010-2019 Area 3 | 8                      | 786     | 1          | 72                        | SST + BOTTOM                                                     | 18                        | SLOPE                                                       |
| 2010-2019 Area 4 | 107                    | 1845    | 5.8        | 15                        | SST + SHORE + DEPTH + SEARCHING                                  | 7                         | DESAL + SEARCHING                                           |
| 2010-2019 Area 5 | 48                     | 1842    | 2.6        | 10                        | SEARCHING                                                        | 1                         | SST                                                         |

Table S4. Table displaying total kilometers of survey effort between the years 1999-2020 across the entire study area as well as across the ‘Dd Area’. Also displayed is the number of *T. truncatus* and *D. delphis* sighting. Each parameter is summed according to month-of-the-year and displayed according to relevant month.

| 1999-2020                        | Jan   | Feb   | Mar   | Apr   | May   | Jun   | Jul   | Aug   | Sep   | Oct   | Nov   | Dec   |
|----------------------------------|-------|-------|-------|-------|-------|-------|-------|-------|-------|-------|-------|-------|
| Study Area - Kilometers Surveyed | 3,022 | 3,123 | 2,453 | 2,722 | 5,993 | 6,949 | 4,100 | 4,525 | 3,133 | 2,922 | 3,674 | 2,768 |
| <i>T. truncatus</i> Sightings    | 27    | 19    | 15    | 31    | 30    | 37    | 24    | 34    | 29    | 35    | 33    | 24    |
| Dd Area - Kilometers Surveyed    | 1,703 | 1,960 | 1,439 | 1,930 | 3,384 | 3,511 | 2,617 | 3,199 | 2,070 | 2,087 | 2,452 | 1,869 |
| <i>D. delphis</i> Sightings      | 0     | 0     | 0     | 1     | 6     | 6     | 10    | 6     | 3     | 3     | 3     | 2     |

Table S5. Table displaying total kilometers of survey effort between the years 1999-2020 across the five sections of the study area as well as across outside the study area. Also displayed is the number of *T. truncatus* and *D. delphis* sighting in each area.

| 1999 - 2020                  | Area 1 | Area 2 | Area 3 | Area 4 | Area 5 | Outside study area |
|------------------------------|--------|--------|--------|--------|--------|--------------------|
| Total Kilometers Surveyed    | 3,982  | 2,837  | 6,830  | 15,099 | 12,386 | 4,114              |
| <i>T. tursiops</i> Sightings | 18     | 3      | 47     | 178    | 80     | 12                 |
| <i>D. delphis</i> Sightings  | 0      | 0      | 1      | 4      | 35     | 0                  |

Table S6. Final models for *Tursiops truncatus* distribution, as run on the full dataset for all years, years 1999-2009, and years 2010-2019. First three rows display results utilizing Negative Binomial distribution, while following three rows utilize Tweedie distribution. Variables that are statistically significant have names marked in blue. All vertical axes indicate the probability of dolphin occurrence on a scale of 0 to 1 (except instances where scale is minimized for clarity), while horizontal axes are presented in the units of the relevant explanatory variable, and above the horizontal axis are markings, indicating number of non-zero observations at that value of explanatory variable. Gray shaded areas represent 95% Confidence Interval.

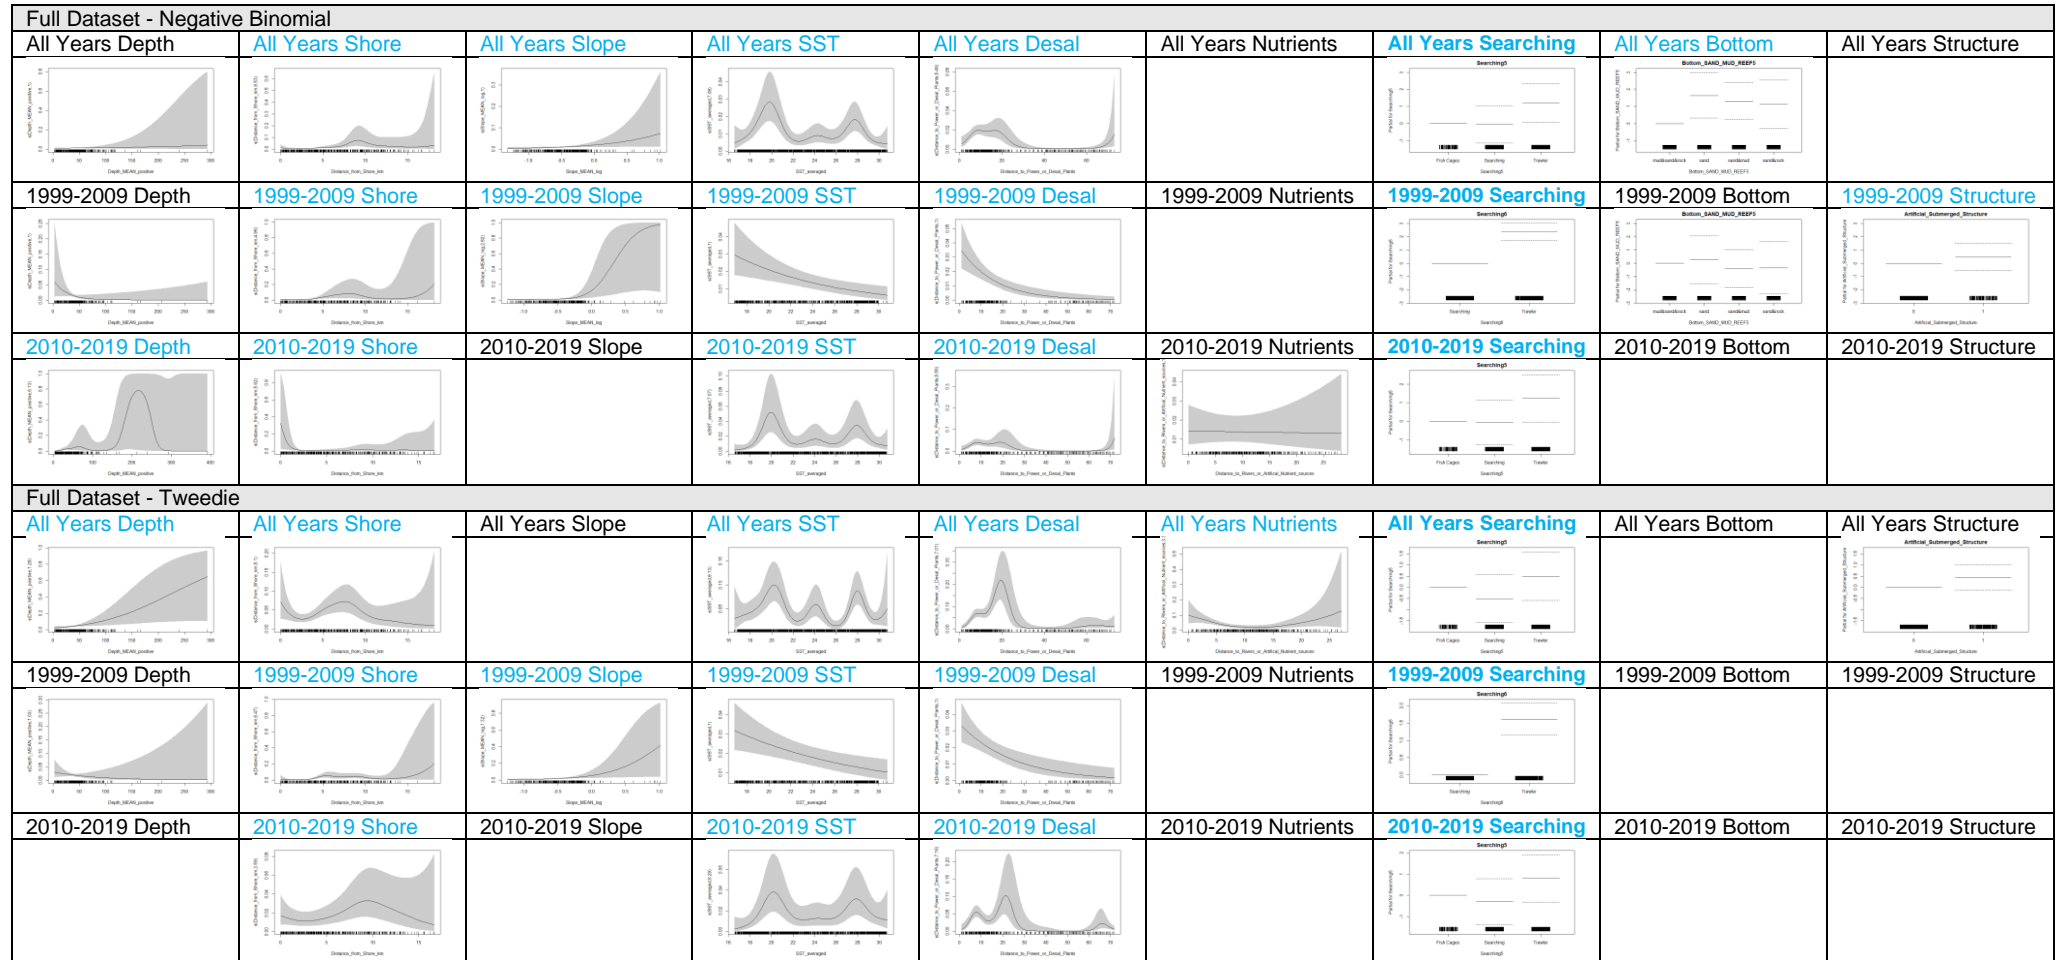

\* Depth = Depth (m), Shore = Distance to Shore (km), Slope = log(Slope), SST = Sea Surface Temperature (°C), Desal = Distance to Desalination or Power Plants (km), Nutrients = Distance to Rivers or Artificial Nutrient Sources (km), Searching = Searching (randomized)/Trawler (in vicinity)/Fish Cages (in vicinity), Bottom = Type of substrate (mud/sand/rock), Structure = Artificial Submerged Structure (present/not present).

Table S7. Final models for *Tursiops truncatus* distribution, as run on the ‘Hot Season’ dataset for all years, years 1999-2009, and years 2010-2019. First three rows display results utilizing Negative Binomial distribution, while following three rows utilize Tweedie distribution. Variables that are statistically significant have names marked in blue. All vertical axes indicate the probability of dolphin occurrence on a scale of 0 to 1 (except instances where scale is minimized for clarity), while horizontal axes are presented in the units of the relevant explanatory variable, and above the horizontal axis are markings, indicating number of non-zero observations at that value of explanatory variable. Gray shaded areas represent 95% Confidence Interval.

| Hot Season – Negative Binomial |                 |                 |               |                 |                     |                     |                  |                     |
|--------------------------------|-----------------|-----------------|---------------|-----------------|---------------------|---------------------|------------------|---------------------|
| All Years Depth                | All Years Shore | All Years Slope | All Years SST | All Years Desal | All Years Nutrients | All Years Searching | All Years Bottom | All Years Structure |
|                                |                 |                 |               |                 |                     |                     |                  |                     |
| 1999-2009 Depth                | 1999-2009 Shore | 1999-2009 Slope | 1999-2009 SST | 1999-2009 Desal | 1999-2009 Nutrients | 1999-2009 Searching | 1999-2009 Bottom | 1999-2009 Structure |
|                                |                 |                 |               |                 |                     |                     |                  |                     |
| 2010-2019 Depth                | 2010-2019 Shore | 2010-2019 Slope | 2010-2019 SST | 2010-2019 Desal | 2010-2019 Nutrients | 2010-2019 Searching | 2010-2019 Bottom | 2010-2019 Structure |
|                                |                 |                 |               |                 |                     |                     |                  |                     |
| Hot Season - Tweedie           |                 |                 |               |                 |                     |                     |                  |                     |
| All Years Depth                | All Years Shore | All Years Slope | All Years SST | All Years Desal | All Years Nutrients | All Years Searching | All Years Bottom | All Years Structure |
|                                |                 |                 |               |                 |                     |                     |                  |                     |
| 1999-2009 Depth                | 1999-2009 Shore | 1999-2009 Slope | 1999-2009 SST | 1999-2009 Desal | 1999-2009 Nutrients | 1999-2009 Searching | 1999-2009 Bottom | 1999-2009 Structure |
|                                |                 |                 |               |                 |                     |                     |                  |                     |
| 2010-2019 Depth                | 2010-2019 Shore | 2010-2019 Slope | 2010-2019 SST | 2010-2019 Desal | 2010-2019 Nutrients | 2010-2019 Searching | 2010-2019 Bottom | 2010-2019 Structure |
|                                |                 |                 |               |                 |                     |                     |                  |                     |

\* Depth = Depth (m), Shore = Distance to Shore (km), Slope = log(Slope), SST = Sea Surface Temperature (°C), Desal = Distance to Desalination or Power Plants (km), Nutrients = Distance to Rivers or Artificial Nutrient Sources (km), Searching = Searching (randomized)/Trawler (in vicinity)/Fish Cages (in vicinity), Bottom = Type of substrate (mud/sand/rock), Structure = Artificial Submerged Structure (present/not present).

Table S8. Final models for *Tursiops truncatus* distribution, as run on the ‘Cold Season’ dataset for all years, years 1999-2009, and years 2010-2019. First three rows display results utilizing Negative Binomial distribution, while following three rows utilize Tweedie distribution. Variables that are statistically significant have names marked in blue. All vertical axes indicate the probability of dolphin occurrence on a scale of 0 to 1 (except instances where scale is minimized for clarity), while horizontal axes are presented in the units of the relevant explanatory variable, and above the horizontal axis are markings, indicating number of non-zero observations at that value of explanatory variable. Gray shaded areas represent 95% Confidence Interval.

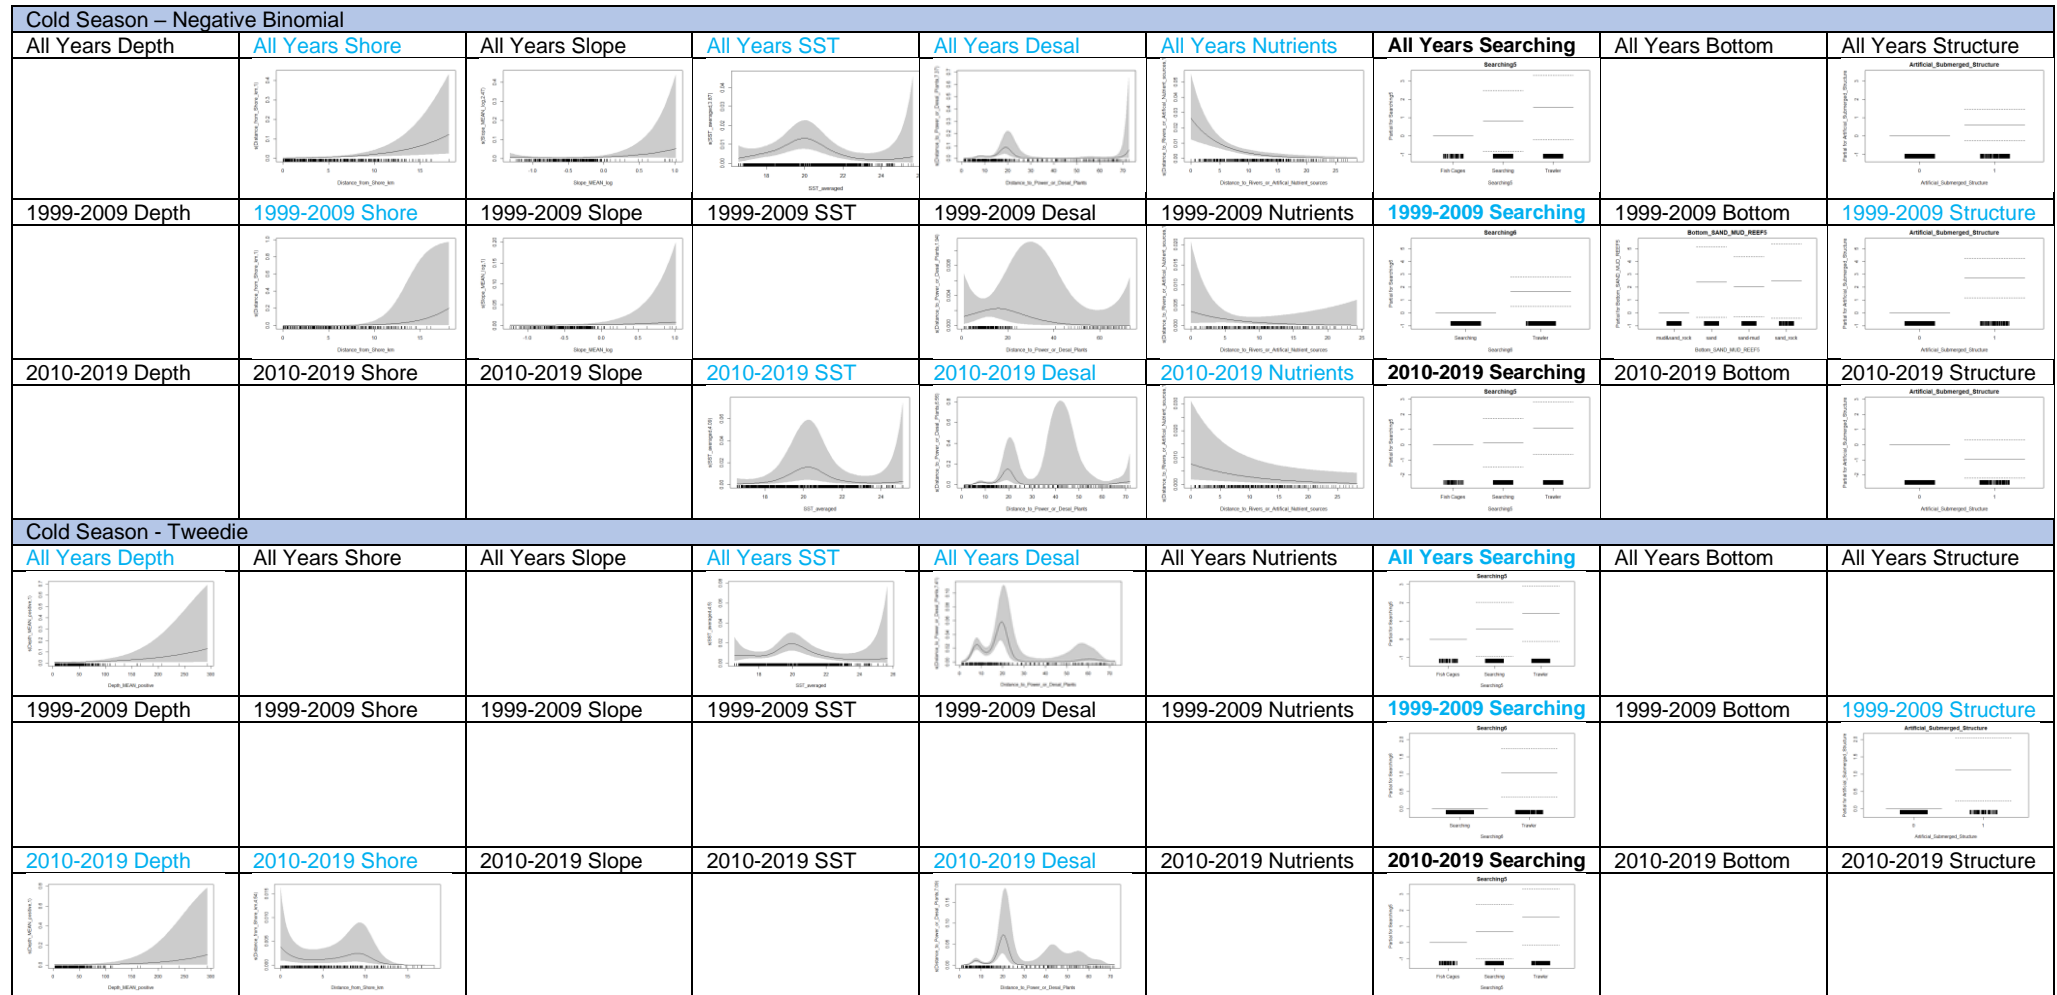

\* Depth = Depth (m), Shore = Distance to Shore (km), Slope = log(Slope), SST = Sea Surface Temperature (°C), Desal = Distance to Desalination or Power Plants (km), Nutrients = Distance to Rivers or Artificial Nutrient Sources (km), Searching = Searching (randomized)/Trawler (in vicinity)/Fish Cages (in vicinity), Bottom = Type of substrate (mud/sand/rock), Structure = Artificial Submerged Structure (present/not present).

Table S9. Final models for *Tursiops truncatus* distribution, as run on the spatial subsets (Areas 1/2/3/4/5) for all years, years 1999-2009, and years 2010-2019. First three rows in each section displays results utilizing Negative Binomial distribution, while following three rows utilize Tweedie distribution. Variables that are statistically significant have names marked in blue. All vertical axes indicate the probability of dolphin occurrence on a scale of 0 to 1 (except instances where scale is minimized for clarity), while horizontal axes are presented in the units of the relevant explanatory variable, and above the horizontal axis are markings, indicating number of non-zero observations at that value of explanatory variable. Gray shaded areas represent 95% Confidence Interval.

| Area 1 – Negative Binomial                                                         |                 |                                                                                    |                                                                                   |                                                                                       |                     |                                                                                       |                  |                     |
|------------------------------------------------------------------------------------|-----------------|------------------------------------------------------------------------------------|-----------------------------------------------------------------------------------|---------------------------------------------------------------------------------------|---------------------|---------------------------------------------------------------------------------------|------------------|---------------------|
| All Years Depth                                                                    | All Years Shore | All Years Slope                                                                    | All Years SST                                                                     | All Years Desal                                                                       | All Years Nutrients | All Years Searching                                                                   | All Years Bottom | All Years Structure |
| 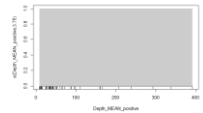  |                 |                                                                                    |                                                                                   |    |                     |                                                                                       |                  |                     |
| 1999-2009 Depth                                                                    | 1999-2009 Shore | 1999-2009 Slope                                                                    | 1999-2009 SST                                                                     | 1999-2009 Desal                                                                       | 1999-2009 Nutrients | 1999-2009 Searching                                                                   | 1999-2009 Bottom | 1999-2009 Structure |
|                                                                                    |                 |                                                                                    |  |                                                                                       |                     |                                                                                       |                  |                     |
| 2010-2019 Depth                                                                    | 2010-2019 Shore | 2010-2019 Slope                                                                    | 2010-2019 SST                                                                     | 2010-2019 Desal                                                                       | 2010-2019 Nutrients | 2010-2019 Searching                                                                   | 2010-2019 Bottom | 2010-2019 Structure |
|                                                                                    |                 |                                                                                    |                                                                                   |    |                     |    |                  |                     |
| Area 1 - Tweedie                                                                   |                 |                                                                                    |                                                                                   |                                                                                       |                     |                                                                                       |                  |                     |
| All Years Depth                                                                    | All Years Shore | All Years Slope                                                                    | All Years SST                                                                     | All Years Desal                                                                       | All Years Nutrients | All Years Searching                                                                   | All Years Bottom | All Years Structure |
|                                                                                    |                 |                                                                                    |                                                                                   |    |                     |    |                  |                     |
| 1999-2009 Depth                                                                    | 1999-2009 Shore | 1999-2009 Slope                                                                    | 1999-2009 SST                                                                     | 1999-2009 Desal                                                                       | 1999-2009 Nutrients | 1999-2009 Searching                                                                   | 1999-2009 Bottom | 1999-2009 Structure |
|  |                 |  |                                                                                   |                                                                                       |                     |                                                                                       |                  |                     |
| 2010-2019 Depth                                                                    | 2010-2019 Shore | 2010-2019 Slope                                                                    | 2010-2019 SST                                                                     | 2010-2019 Desal                                                                       | 2010-2019 Nutrients | 2010-2019 Searching                                                                   | 2010-2019 Bottom | 2010-2019 Structure |
|                                                                                    |                 |                                                                                    |                                                                                   |  |                     |  |                  |                     |



| Area 3 – Negative Binomial                                                        |                 |                                                                                    |                                                                                   |                                                                                     |                     |                                                                                     |                                                                                     |                                                                                     |
|-----------------------------------------------------------------------------------|-----------------|------------------------------------------------------------------------------------|-----------------------------------------------------------------------------------|-------------------------------------------------------------------------------------|---------------------|-------------------------------------------------------------------------------------|-------------------------------------------------------------------------------------|-------------------------------------------------------------------------------------|
| All Years Depth                                                                   | All Years Shore | All Years Slope                                                                    | All Years SST                                                                     | All Years Desal                                                                     | All Years Nutrients | All Years Searching                                                                 | All Years Bottom                                                                    | All Years Structure                                                                 |
| 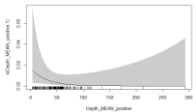 |                 |                                                                                    |                                                                                   |  |                     |  |  |                                                                                     |
| 1999-2009 Depth                                                                   | 1999-2009 Shore | 1999-2009 Slope                                                                    | 1999-2009 SST                                                                     | 1999-2009 Desal                                                                     | 1999-2009 Nutrients | 1999-2009 Searching                                                                 | 1999-2009 Bottom                                                                    | 1999-2009 Structure                                                                 |
|                                                                                   |                 |                                                                                    |                                                                                   |                                                                                     |                     |  |  |  |
| 2010-2019 Depth                                                                   | 2010-2019 Shore | 2010-2019 Slope                                                                    | 2010-2019 SST                                                                     | 2010-2019 Desal                                                                     | 2010-2019 Nutrients | 2010-2019 Searching                                                                 | 2010-2019 Bottom                                                                    | 2010-2019 Structure                                                                 |
|                                                                                   |                 |                                                                                    |  |                                                                                     |                     |                                                                                     |  |                                                                                     |
| Area 3 - Tweedie                                                                  |                 |                                                                                    |                                                                                   |                                                                                     |                     |                                                                                     |                                                                                     |                                                                                     |
| All Years Depth                                                                   | All Years Shore | All Years Slope                                                                    | All Years SST                                                                     | All Years Desal                                                                     | All Years Nutrients | All Years Searching                                                                 | All Years Bottom                                                                    | All Years Structure                                                                 |
|                                                                                   |                 |                                                                                    |                                                                                   |  |                     |  |                                                                                     |                                                                                     |
| 1999-2009 Depth                                                                   | 1999-2009 Shore | 1999-2009 Slope                                                                    | 1999-2009 SST                                                                     | 1999-2009 Desal                                                                     | 1999-2009 Nutrients | 1999-2009 Searching                                                                 | 1999-2009 Bottom                                                                    | 1999-2009 Structure                                                                 |
|  |                 |                                                                                    |                                                                                   |                                                                                     |                     |  |                                                                                     |                                                                                     |
| 2010-2019 Depth                                                                   | 2010-2019 Shore | 2010-2019 Slope                                                                    | 2010-2019 SST                                                                     | 2010-2019 Desal                                                                     | 2010-2019 Nutrients | 2010-2019 Searching                                                                 | 2010-2019 Bottom                                                                    | 2010-2019 Structure                                                                 |
|                                                                                   |                 |  |                                                                                   |                                                                                     |                     |                                                                                     |                                                                                     |                                                                                     |

| Area 4 – Negative Binomial                                                        |                                                                                   |                 |                                                                                   |                                                                                      |                     |                                                                                      |                  |                     |
|-----------------------------------------------------------------------------------|-----------------------------------------------------------------------------------|-----------------|-----------------------------------------------------------------------------------|--------------------------------------------------------------------------------------|---------------------|--------------------------------------------------------------------------------------|------------------|---------------------|
| All Years Depth                                                                   | All Years Shore                                                                   | All Years Slope | All Years SST                                                                     | All Years Desal                                                                      | All Years Nutrients | All Years Searching                                                                  | All Years Bottom | All Years Structure |
|                                                                                   |  |                 |  |                                                                                      |                     |   |                  |                     |
| 1999-2009 Depth                                                                   | 1999-2009 Shore                                                                   | 1999-2009 Slope | 1999-2009 SST                                                                     | 1999-2009 Desal                                                                      | 1999-2009 Nutrients | 1999-2009 Searching                                                                  | 1999-2009 Bottom | 1999-2009 Structure |
|                                                                                   |                                                                                   |                 |  |                                                                                      |                     |   |                  |                     |
| 2010-2019 Depth                                                                   | 2010-2019 Shore                                                                   | 2010-2019 Slope | 2010-2019 SST                                                                     | 2010-2019 Desal                                                                      | 2010-2019 Nutrients | 2010-2019 Searching                                                                  | 2010-2019 Bottom | 2010-2019 Structure |
|  |  |                 |  |                                                                                      |                     |   |                  |                     |
| Area 4 - Tweedie                                                                  |                                                                                   |                 |                                                                                   |                                                                                      |                     |                                                                                      |                  |                     |
| All Years Depth                                                                   | All Years Shore                                                                   | All Years Slope | All Years SST                                                                     | All Years Desal                                                                      | All Years Nutrients | All Years Searching                                                                  | All Years Bottom | All Years Structure |
|                                                                                   |                                                                                   |                 |  |                                                                                      |                     |   |                  |                     |
| 1999-2009 Depth                                                                   | 1999-2009 Shore                                                                   | 1999-2009 Slope | 1999-2009 SST                                                                     | 1999-2009 Desal                                                                      | 1999-2009 Nutrients | 1999-2009 Searching                                                                  | 1999-2009 Bottom | 1999-2009 Structure |
|                                                                                   |                                                                                   |                 |                                                                                   |                                                                                      |                     |   |                  |                     |
| 2010-2019 Depth                                                                   | 2010-2019 Shore                                                                   | 2010-2019 Slope | 2010-2019 SST                                                                     | 2010-2019 Desal                                                                      | 2010-2019 Nutrients | 2010-2019 Searching                                                                  | 2010-2019 Bottom | 2010-2019 Structure |
|                                                                                   |                                                                                   |                 |                                                                                   |  |                     |  |                  |                     |

| Area 5 - Negative Binomial |                 |                 |                                                                                    |                 |                     |                                                                                     |                  |                     |
|----------------------------|-----------------|-----------------|------------------------------------------------------------------------------------|-----------------|---------------------|-------------------------------------------------------------------------------------|------------------|---------------------|
| All Years Depth            | All Years Shore | All Years Slope | All Years SST                                                                      | All Years Desal | All Years Nutrients | All Years Searching                                                                 | All Years Bottom | All Years Structure |
|                            |                 |                 |                                                                                    |                 |                     | 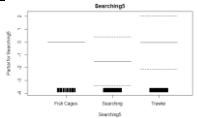 |                  |                     |
| 1999-2009 Depth            | 1999-2009 Shore | 1999-2009 Slope | 1999-2009 SST                                                                      | 1999-2009 Desal | 1999-2009 Nutrients | 1999-2009 Searching                                                                 | 1999-2009 Bottom | 1999-2009 Structure |
|                            |                 |                 |   |                 |                     |                                                                                     |                  |                     |
| 2010-2019 Depth            | 2010-2019 Shore | 2010-2019 Slope | 2010-2019 SST                                                                      | 2010-2019 Desal | 2010-2019 Nutrients | 2010-2019 Searching                                                                 | 2010-2019 Bottom | 2010-2019 Structure |
|                            |                 |                 |                                                                                    |                 |                     |  |                  |                     |
| Area 5 - Tweedie           |                 |                 |                                                                                    |                 |                     |                                                                                     |                  |                     |
| All Years Depth            | All Years Shore | All Years Slope | All Years SST                                                                      | All Years Desal | All Years Nutrients | All Years Searching                                                                 | All Years Bottom | All Years Structure |
|                            |                 |                 |                                                                                    |                 |                     |  |                  |                     |
| 1999-2009 Depth            | 1999-2009 Shore | 1999-2009 Slope | 1999-2009 SST                                                                      | 1999-2009 Desal | 1999-2009 Nutrients | 1999-2009 Searching                                                                 | 1999-2009 Bottom | 1999-2009 Structure |
|                            |                 |                 |   |                 |                     |                                                                                     |                  |                     |
| 2010-2019 Depth            | 2010-2019 Shore | 2010-2019 Slope | 2010-2019 SST                                                                      | 2010-2019 Desal | 2010-2019 Nutrients | 2010-2019 Searching                                                                 | 2010-2019 Bottom | 2010-2019 Structure |
|                            |                 |                 |  |                 |                     |                                                                                     |                  |                     |

\* Depth = Depth (m), Shore = Distance to Shore (km), Slope = log(Slope), SST = Sea Surface Temperature (°C), Desal = Distance to Desalination or Power Plants (km), Nutrients = Distance to Rivers or Artificial Nutrient Sources (km), Searching = Searching (randomized)/Trawler (in vicinity)/Fish Cages (in vicinity), Bottom = Type of substrate (mud/sand/rock), Structure = Artificial Submerged Structure (present/not present).

Table S10. Summary of ‘trawler-excluded’ models for each spatial section. Information includes number of sightings within the subset, number of zero values, deviance explained for both Negative Binomial and Tweedie models, and names of explanatory variables for both Negative Binomial and Tweedie models.

| Model name               | Searching Dolphin Observations | Searching Zero | Trawler Dolphin Observations | Trawler Zero | Fish Cages Dolphin Observations | Fish Cages Zero | % Deviance Explained (NB) | Variable names (NB)             | % Deviance Explained (TW) | Variable names (TW)         |
|--------------------------|--------------------------------|----------------|------------------------------|--------------|---------------------------------|-----------------|---------------------------|---------------------------------|---------------------------|-----------------------------|
| Sec 3 & 4 & 5, All Years | 125                            | 15715          | 139                          | 3494         | 6                               | 786             | 13                        | DEPTH + DESAL + SST + WRECK     | 19                        | DEPTH + SHORE + DESAL + SST |
| Sec 3, All Years         | 25                             | 3491           | 17                           | 366          | 1                               | 489             | 33                        | DESAL + BOTTOM + DEPTH          | 9                         | SHORE                       |
| Sec 4, All Years         | 76                             | 7502           | 96                           | 2119         | 0                               | 0               | 21                        | SST + DEPTH + BOTTOM            | 2                         | DESAL                       |
| Sec 5, All Years         | 24                             | 4722           | 26                           | 1009         | 5                               | 297             | 14                        | NUTRIENTS + DEPTH + DESAL + SST | 9                         | NUTRIENTS + SST             |

Table S11. Final models for *Tursiops truncatus* distribution, as run on the ‘trawler-excluded’ dataset (Areas 3&4&5/3/4/5) for all years, years 1999-2009, and years 2010-2019. Results utilizing Negative Binomial distribution are displayed, followed by results utilizing Tweedie distribution. Variables that are statistically significant have names marked in blue. All vertical axes indicate the probability of dolphin occurrence on a scale of 0 to 1 (except instances where scale is minimized for clarity), while horizontal axes are presented in the units of the relevant explanatory variable, and above the horizontal axis are markings, indicating number of non-zero observations at that value of explanatory variable. Gray shaded areas represent 95% Confidence Interval.

| Trawler Excluded – Negative Binomial                                                |                                 |                 |                                                                                      |                                                                                       |                                                                                       |                                                                                       |                                                                                     |
|-------------------------------------------------------------------------------------|---------------------------------|-----------------|--------------------------------------------------------------------------------------|---------------------------------------------------------------------------------------|---------------------------------------------------------------------------------------|---------------------------------------------------------------------------------------|-------------------------------------------------------------------------------------|
| <a href="#">Sec 3,4,5 Depth</a>                                                     | Sec 3,4,5 Shore                 | Sec 3,4,5 Slope | Sec 3,4,5 SST                                                                        | <a href="#">Sec 3,4,5 Desal</a>                                                       | Sec 3,4,5 Nutrients                                                                   | Sec 3,4,5 Bottom                                                                      | Sec 3,4,5 Structure                                                                 |
|    |                                 |                 |    |    |                                                                                       |                                                                                       |  |
| Sec 3 Depth                                                                         | Sec 3 Shore                     | Sec 3 Slope     | Sec 3 SST                                                                            | Sec 3 Desal                                                                           | Sec 3 Nutrients                                                                       | Sec 3 Bottom                                                                          | Sec 3 Structure                                                                     |
|   |                                 |                 |                                                                                      |   |                                                                                       |   |                                                                                     |
| <a href="#">Sec 4 Depth</a>                                                         | Sec 4 Shore                     | Sec 4 Slope     | <a href="#">Sec 4 SST</a>                                                            | Sec 4 Desal                                                                           | Sec 4 Nutrients                                                                       | <a href="#">Sec 4 Bottom</a>                                                          | Sec 4 Structure                                                                     |
|  |                                 |                 |  |                                                                                       |                                                                                       |  |                                                                                     |
| <a href="#">Sec 5 Depth</a>                                                         | Sec 5 Shore                     | Sec 5 Slope     | Sec 5 SST                                                                            | <a href="#">Sec 5 Desal</a>                                                           | Sec 5 Nutrients                                                                       | Sec 5 Bottom                                                                          | Sec 5 Structure                                                                     |
|  |                                 |                 |  |  |  |                                                                                       |                                                                                     |
| Trawler Excluded - Tweedie                                                          |                                 |                 |                                                                                      |                                                                                       |                                                                                       |                                                                                       |                                                                                     |
| Sec 3,4,5 Depth                                                                     | <a href="#">Sec 3,4,5 Shore</a> | Sec 3,4,5 Slope | <a href="#">Sec 3,4,5 SST</a>                                                        | <a href="#">Sec 3,4,5 Desal</a>                                                       | Sec 3,4,5 Nutrients                                                                   | Sec 3,4,5 Bottom                                                                      | Sec 3,4,5 Structure                                                                 |

|                                                                                   |                                                                                   |             |                                                                                    |                                                                                     |                                                                                     |              |                 |
|-----------------------------------------------------------------------------------|-----------------------------------------------------------------------------------|-------------|------------------------------------------------------------------------------------|-------------------------------------------------------------------------------------|-------------------------------------------------------------------------------------|--------------|-----------------|
| 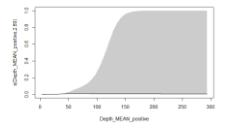 |  |             |  |  |                                                                                     |              |                 |
| Sec 3 Depth                                                                       | Sec 3 Shore                                                                       | Sec 3 Slope | Sec 3 SST                                                                          | Sec 3 Desal                                                                         | Sec 3 Nutrients                                                                     | Sec 3 Bottom | Sec 3 Structure |
|                                                                                   |  |             |                                                                                    |                                                                                     |                                                                                     |              |                 |
| Sec 4 Depth                                                                       | Sec 4 Shore                                                                       | Sec 4 Slope | Sec 4 SST                                                                          | Sec 4 Desal                                                                         | Sec 4 Nutrients                                                                     | Sec 4 Bottom | Sec 4 Structure |
|                                                                                   |                                                                                   |             |                                                                                    |  |                                                                                     |              |                 |
| Sec 5 Depth                                                                       | Sec 5 Shore                                                                       | Sec 5 Slope | Sec 5 SST                                                                          | Sec 5 Desal                                                                         | Sec 5 Nutrients                                                                     | Sec 5 Bottom | Sec 5 Structure |
|                                                                                   |                                                                                   |             |  |                                                                                     |  |              |                 |

\* Depth = Depth (m), Shore = Distance to Shore (km), Slope = log(Slope), SST = Sea Surface Temperature (°C), Desal = Distance to Desalination or Power Plants (km), Nutrients = Distance to Rivers or Artificial Nutrient Sources (km), Searching = Searching (randomized)/Trawler (in vicinity)/Fish Cages (in vicinity), Bottom = Type of substrate (mud/sand/rock), Structure = Artificial Submerged Structure (present/not present).

Table S12. Summary of models from the three *Delphinus delphis* subsets. Information includes number of sightings within the subset, number of zero values, deviance explained for both Negative Binomial and Tweedie models, and names of explanatory variables for both Negative Binomial and Tweedie models.

| Model name                       | N dolphin Observations | N Zeros | % Non-zero | % Deviance Explained (Negative Binomial) | Variable names (Negative Binomial)         | % Deviance Explained (Tweedie) | Variable names (Tweedie) |
|----------------------------------|------------------------|---------|------------|------------------------------------------|--------------------------------------------|--------------------------------|--------------------------|
| Subset 2009 Full Dataset         | 40                     | 1012    | 3.95       | 38                                       | BOTTOM + SHORE + DEPTH + WRECK + SEARCHING | 16                             | DEPTH                    |
| Subset 2016 Full Dataset         | 36                     | 1012    | 3.56       | 41                                       | DEPTH + Lat, Lon + SHORE + DESAL           | 19                             | DEPTH                    |
| Subset 2016, Area 5 Full Dataset | 35                     | 1032    | 3.39       | 29                                       | SHORE + SEARCHING                          | 19                             | DEPTH                    |

Table S13. Final models for *Delphinus delphis* distribution, as run on three subsets. Results utilizing Negative Binomial distribution are displayed, followed by results utilizing Tweedie distribution. Variables that are statistically significant have names marked in blue. All vertical axes indicate the probability of dolphin occurrence on a scale of 0 to 1 (except instances where scale is minimized for clarity), while horizontal axes are presented in the units of the relevant explanatory variable, and above the horizontal axis are markings, indicating number of non-zero observations at that value of explanatory variable. Gray shaded areas represent 95% Confidence Interval.

| Temporal Subsets - Negative Binomial |                             |                                |                           |                             |                                 |                                 |                              |                                 |
|--------------------------------------|-----------------------------|--------------------------------|---------------------------|-----------------------------|---------------------------------|---------------------------------|------------------------------|---------------------------------|
| Subset 2009 - Depth                  | Subset 2009 - Shore         | Subset 2009 - Lat, Lon         | Subset 2009 - SST         | Subset 2009 - Desal         | Subset 2009 - Nutrients         | Subset 2009 - Searching         | Subset 2009 - Bottom         | Subset 2009 - Structure         |
|                                      |                             |                                |                           |                             |                                 |                                 |                              |                                 |
| Subset 2016 - Depth                  | Subset 2016 - Shore         | Subset 2016 - Lat, Lon         | Subset 2016 - SST         | Subset 2016 - Desal         | Subset 2016 - Nutrients         | Subset 2016 - Searching         | Subset 2016 - Bottom         | Subset 2016 - Structure         |
|                                      |                             |                                |                           |                             |                                 |                                 |                              |                                 |
| Subset 2016, Area 5 - Depth          | Subset 2016, Area 5 - Shore | Subset 2016, Area 5 - Lat, Lon | Subset 2016, Area 5 - SST | Subset 2016, Area 5 - Desal | Subset 2016, Area 5 - Nutrients | Subset 2016, Area 5 - Searching | Subset 2016, Area 5 - Bottom | Subset 2016, Area 5 - Structure |
|                                      |                             |                                |                           |                             |                                 |                                 |                              |                                 |
| Temporal Subsets - Tweedie           |                             |                                |                           |                             |                                 |                                 |                              |                                 |
| Subset 2009 - Depth                  | Subset 2009 - Shore         | Subset 2009 - Lat, Lon         | Subset 2009 - SST         | Subset 2009 - Desal         | Subset 2009 - Nutrients         | Subset 2009 - Searching         | Subset 2009 - Bottom         | Subset 2009 - Structure         |
|                                      |                             |                                |                           |                             |                                 |                                 |                              |                                 |
| Subset 2016 - Depth                  | Subset 2016 - Shore         | Subset 2016 - Lat, Lon         | Subset 2016 - SST         | Subset 2016 - Desal         | Subset 2016 - Nutrients         | Subset 2016 - Searching         | Subset 2016 - Bottom         | Subset 2016 - Structure         |
|                                      |                             |                                |                           |                             |                                 |                                 |                              |                                 |
| Subset 2016, Area 5 - Depth          | Subset 2016, Area 5 - Shore | Subset 2016, Area 5 - Lat, Lon | Subset 2016, Area 5 - SST | Subset 2016, Area 5 - Desal | Subset 2016, Area 5 - Nutrients | Subset 2016, Area 5 - Searching | Subset 2016, Area 5 - Bottom | Subset 2016, Area 5 - Structure |
|                                      |                             |                                |                           |                             |                                 |                                 |                              |                                 |

\* Depth = Depth (m), Shore = Distance to Shore (km), Slope = log(Slope), SST = Sea Surface Temperature (°C), Desal = Distance to Desalination or Power Plants (km), Nutrients = Distance to Rivers or Artificial Nutrient Sources (km), Searching = Searching (randomized)/Trawler (in vicinity)/Fish Cages (in vicinity), Bottom = Type of substrate (mud/sand/rock), Structure = Artificial Submerged Structure (present/not present).
